# Supplementary material for: The magnetically induced current density of the [12]infinitene dianion
Source: Royal Society of Chemistry journal article supplement (doi:10.1039/d3cp02214e), 2023-01-01

The current density of the  
[12]infinitene dianion

Animation of the separated diatropic (left) and paratropic (right) current-density contributions of the [12]infinite dication

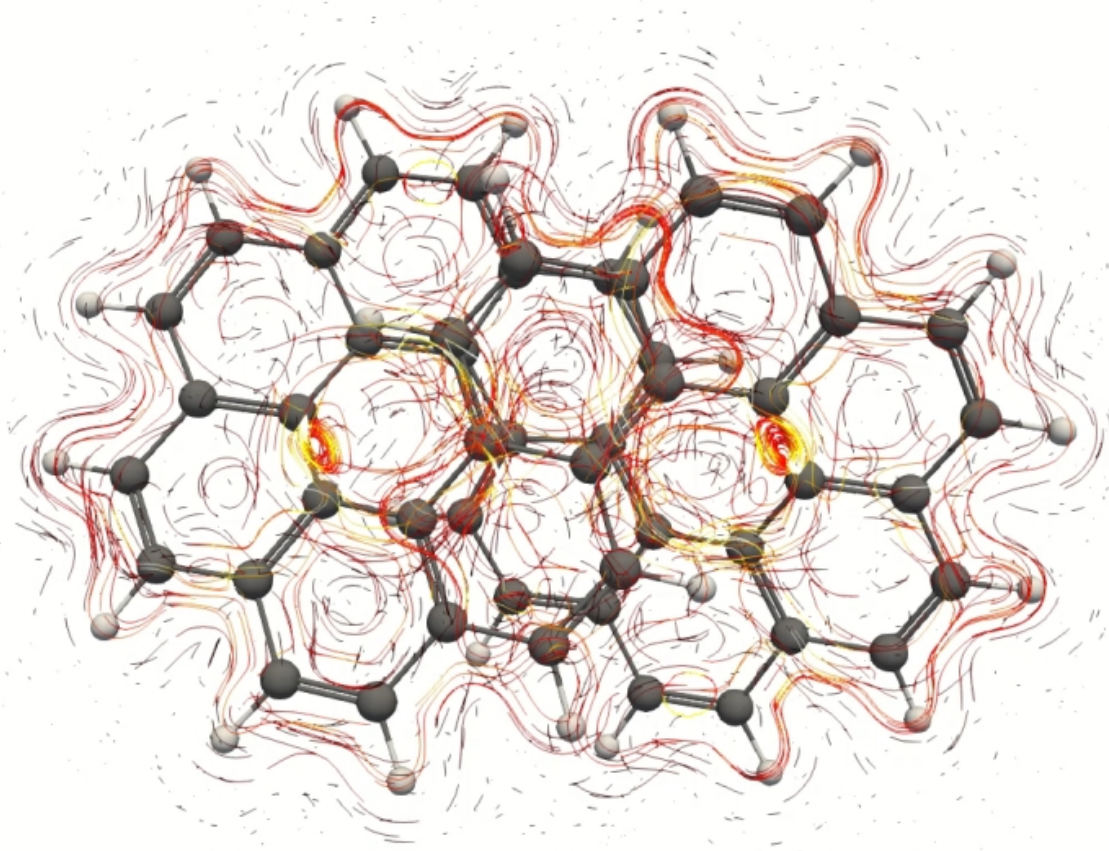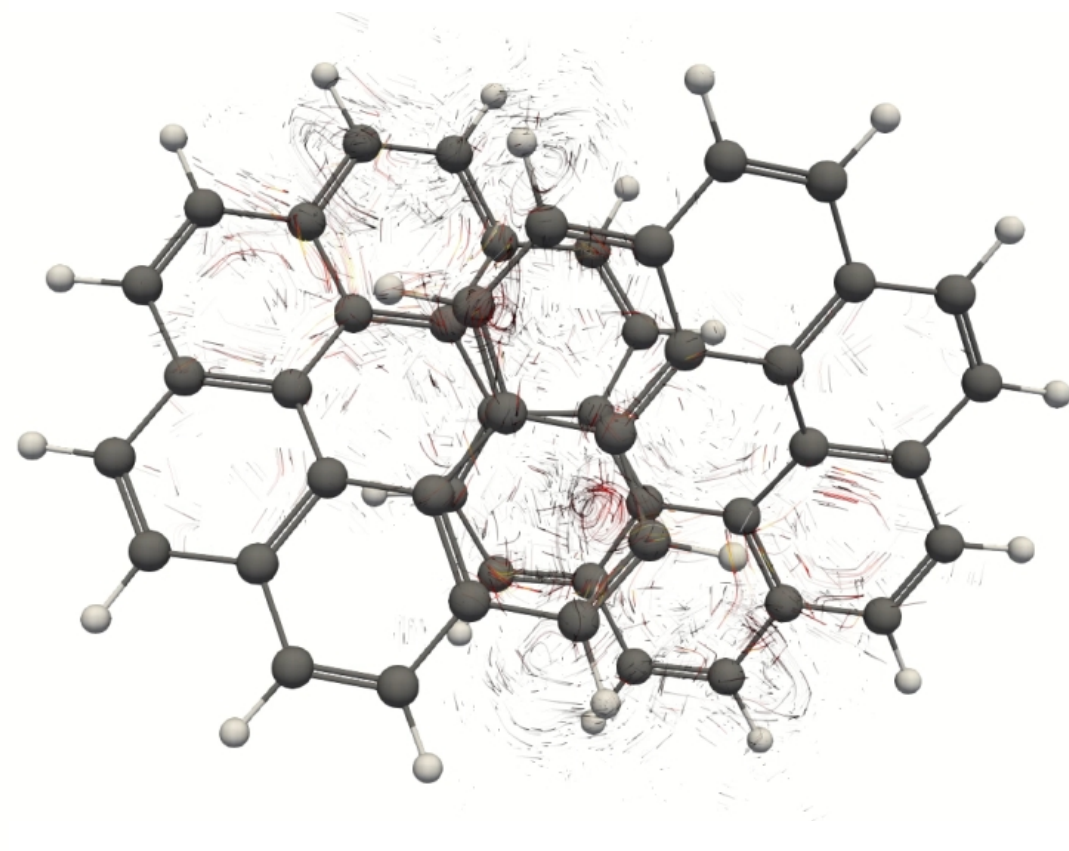

# Current-density profile at plane A

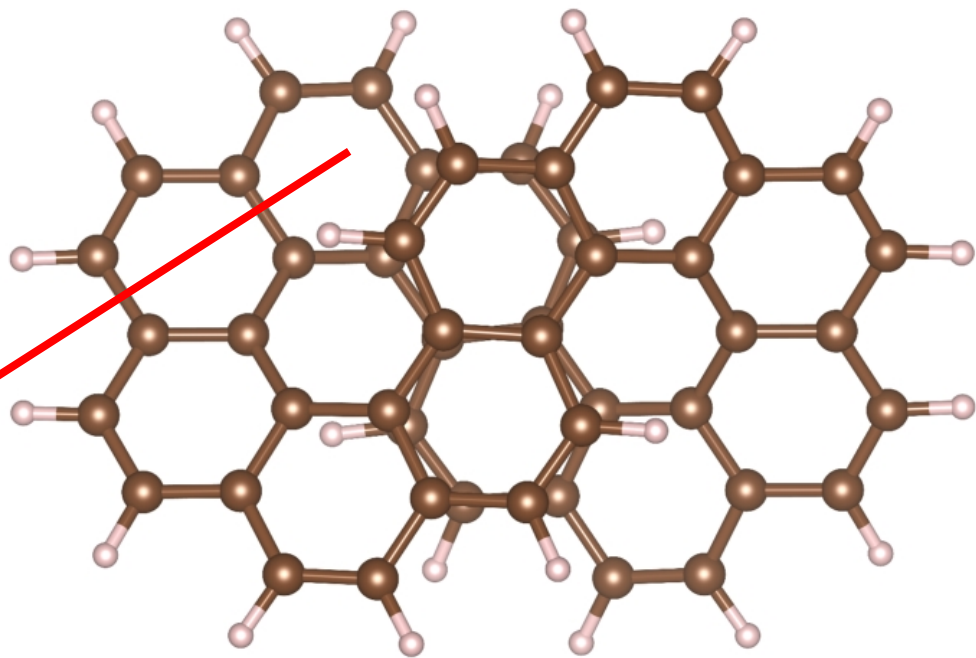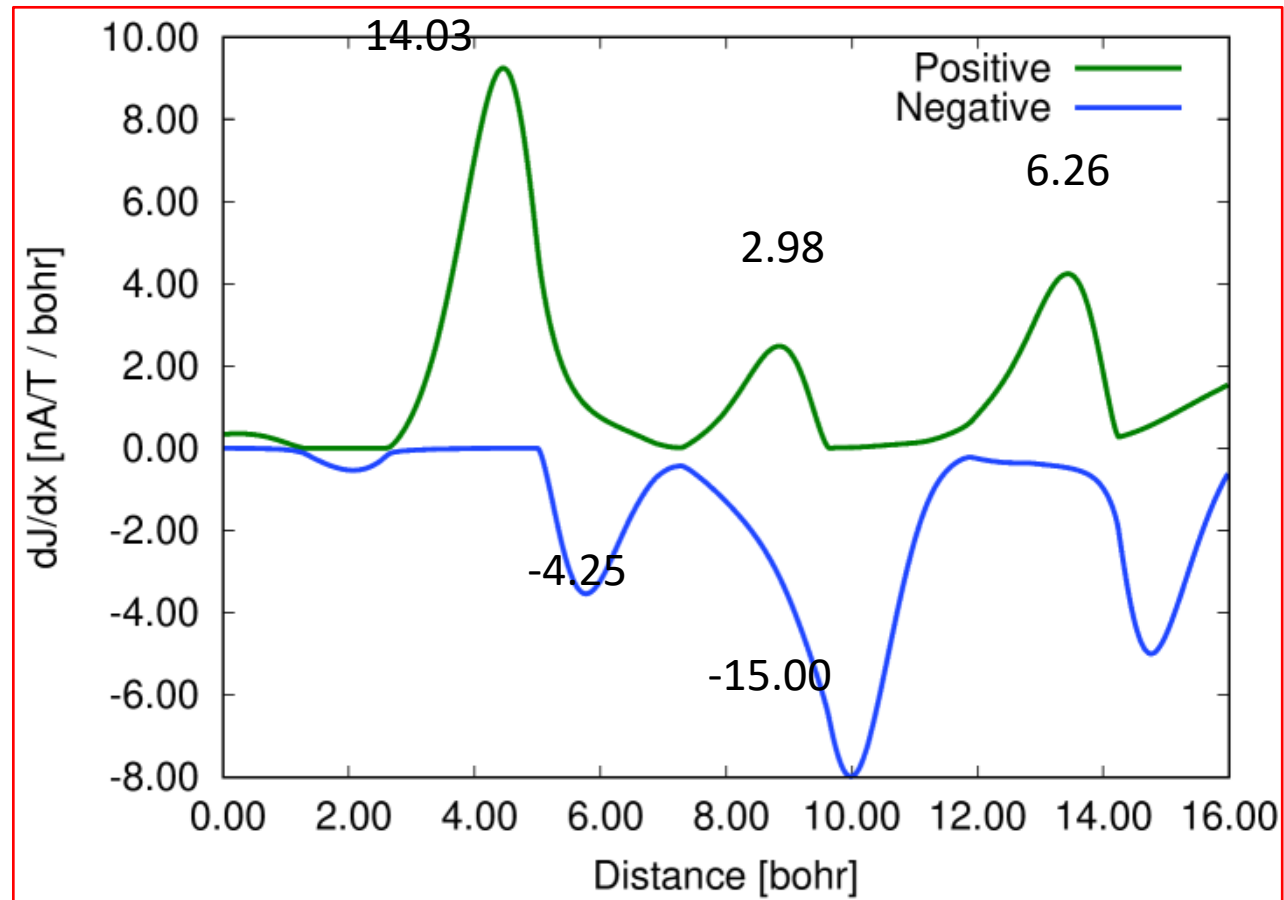

# Current-density profile at plane B

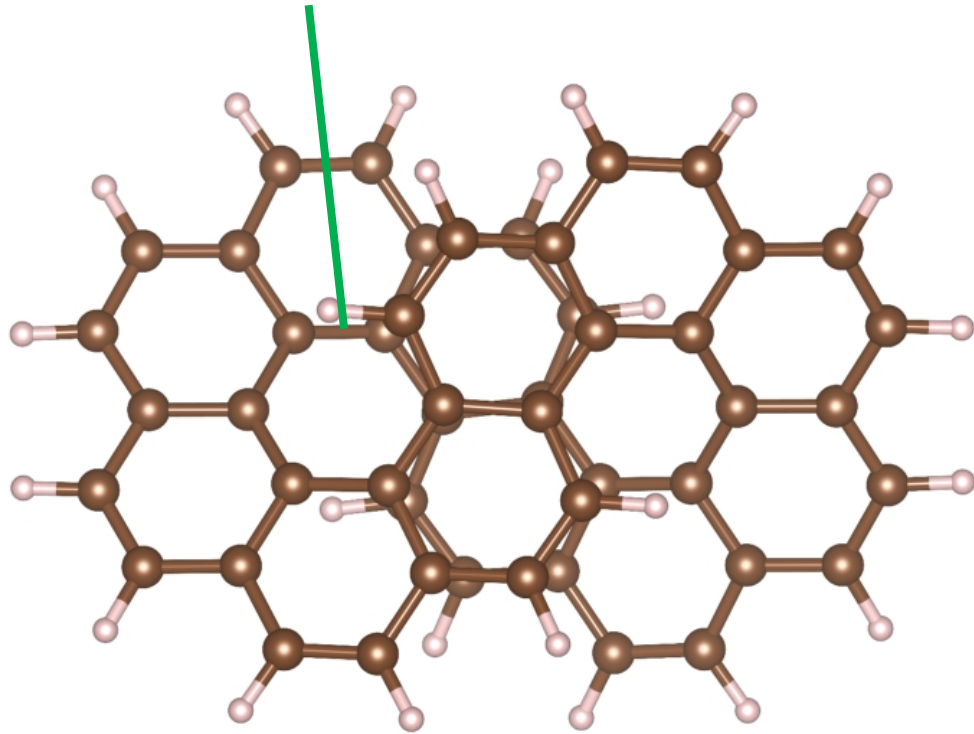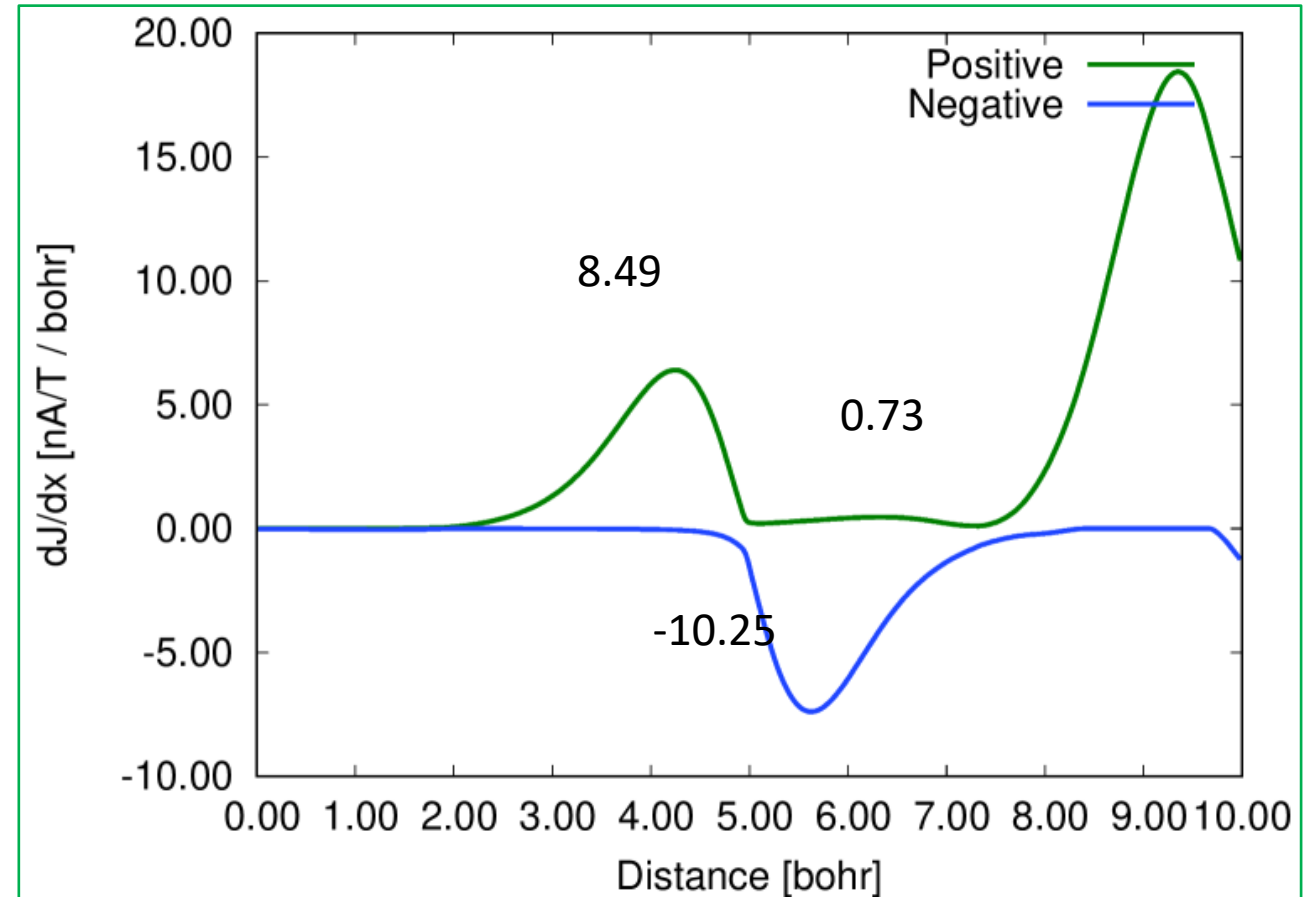

# Current-density profile at the long plane B

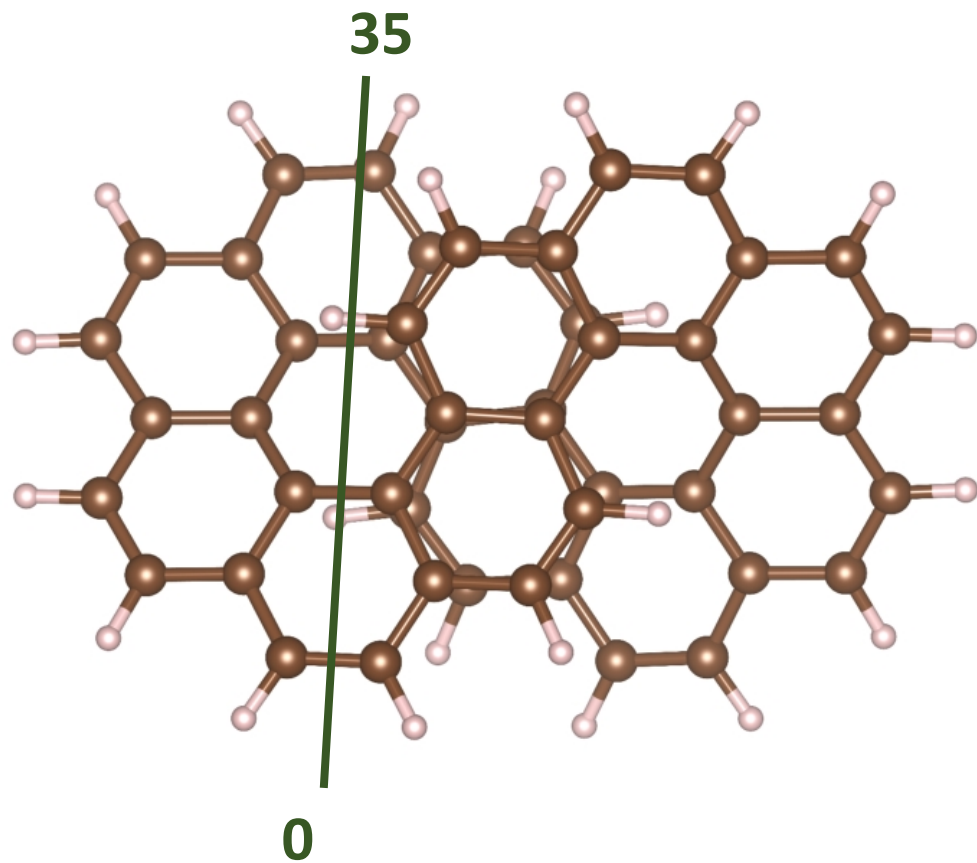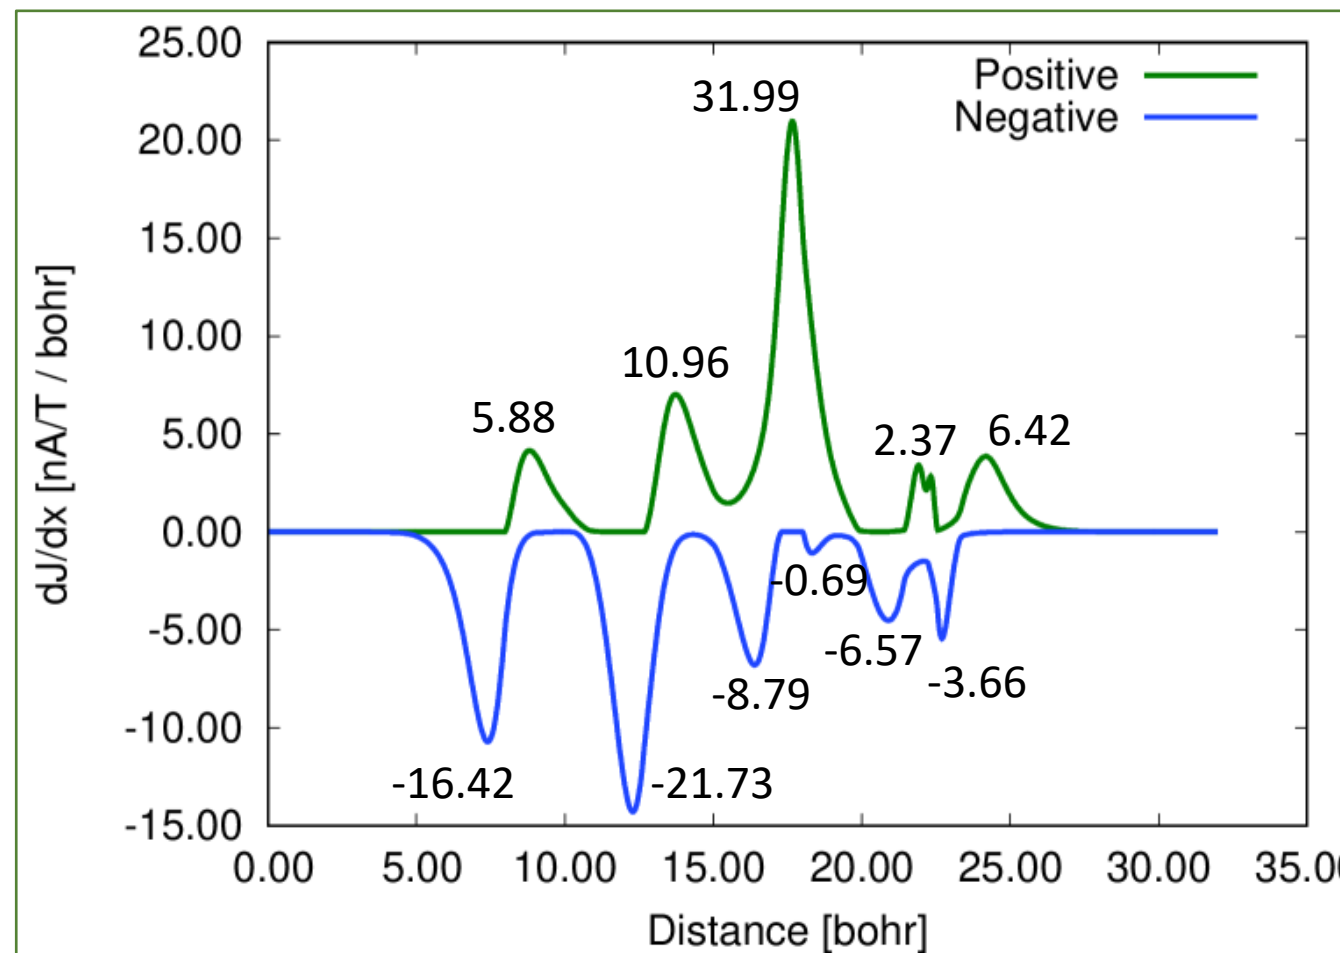

# Current-density profile at plane C

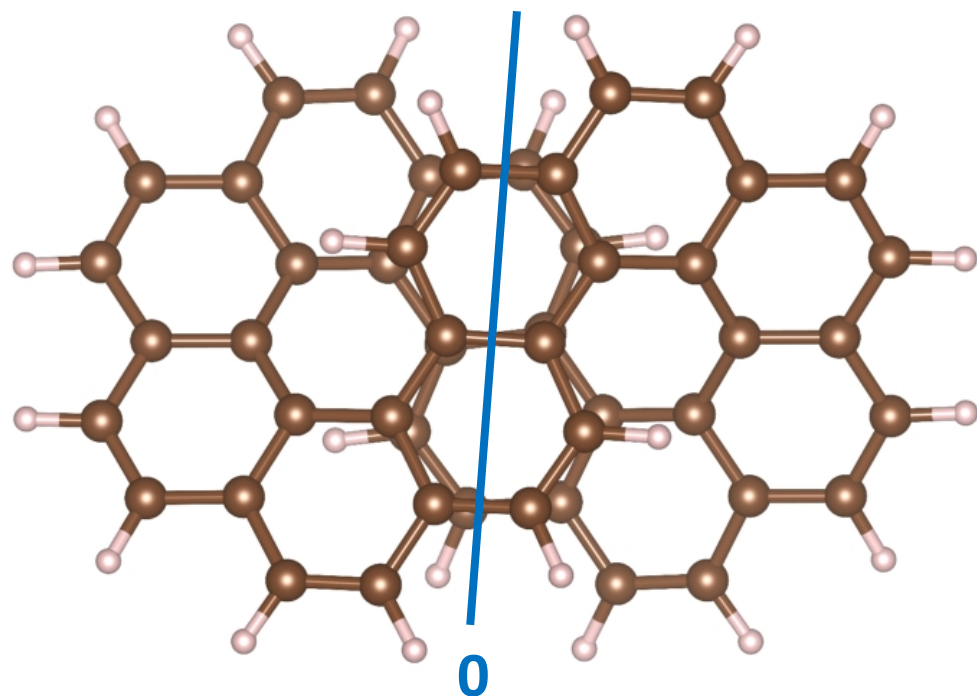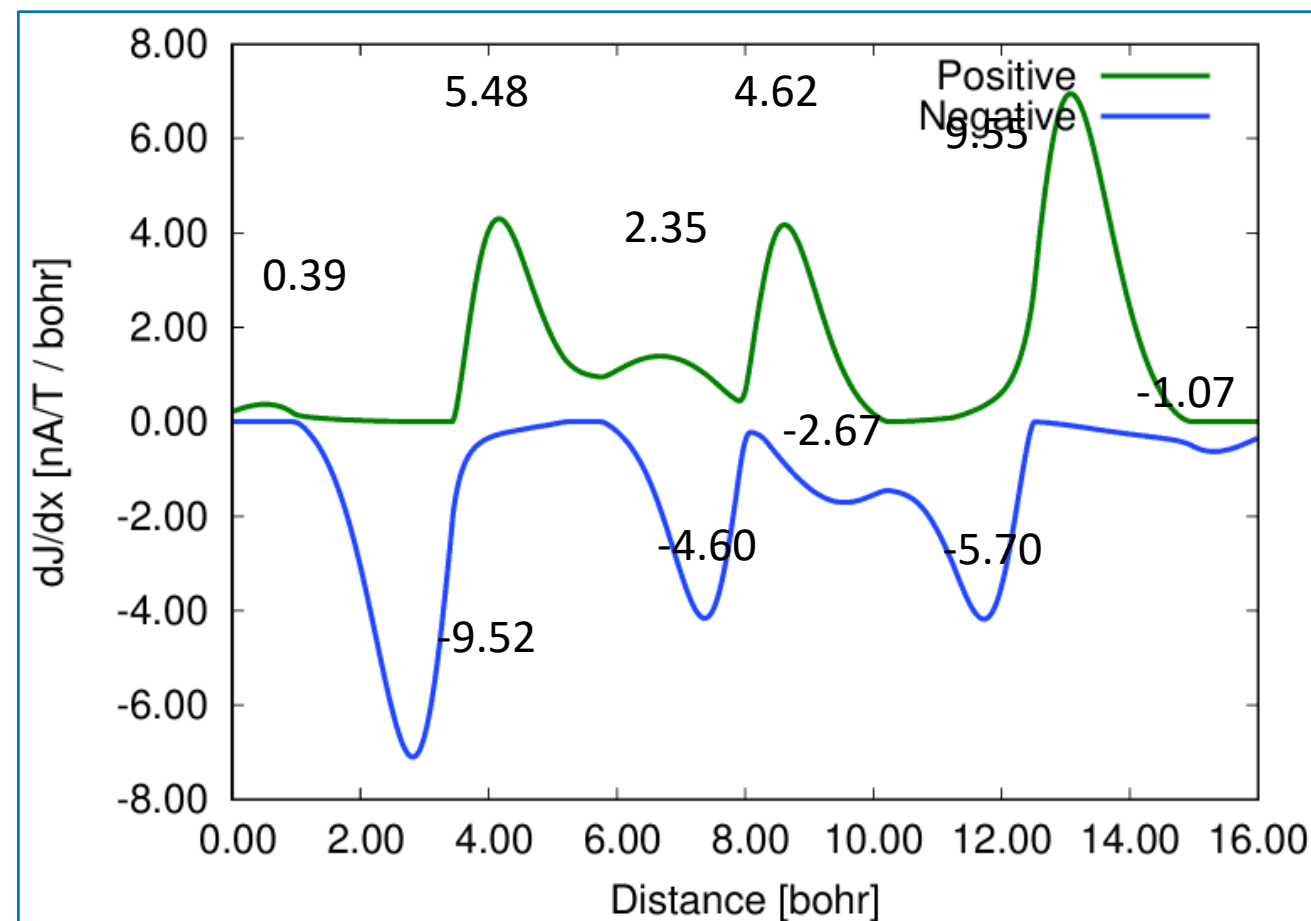

# Current-density profile at plane D

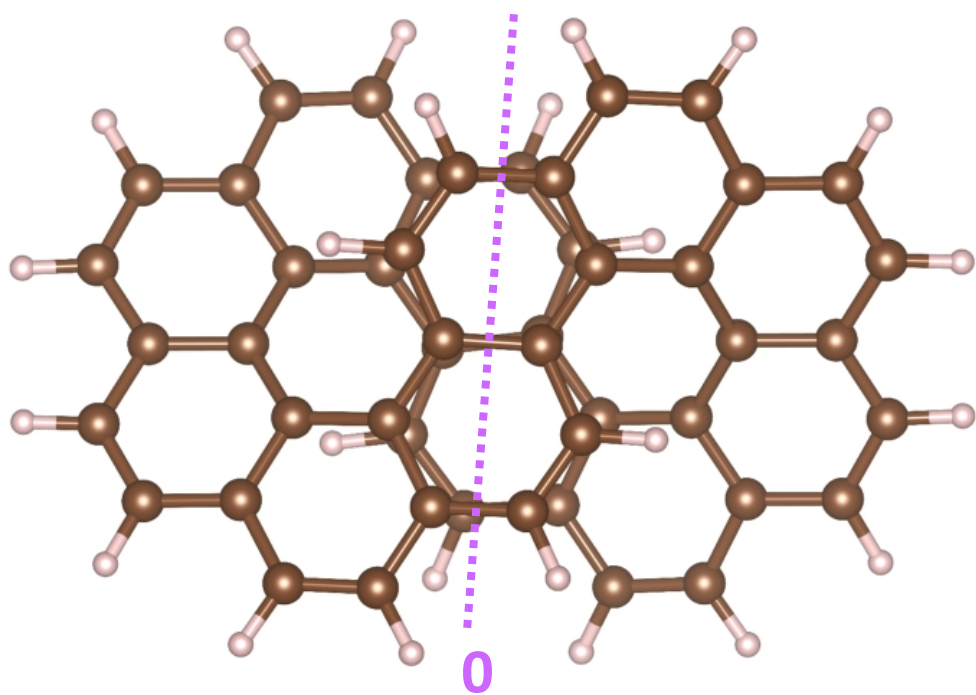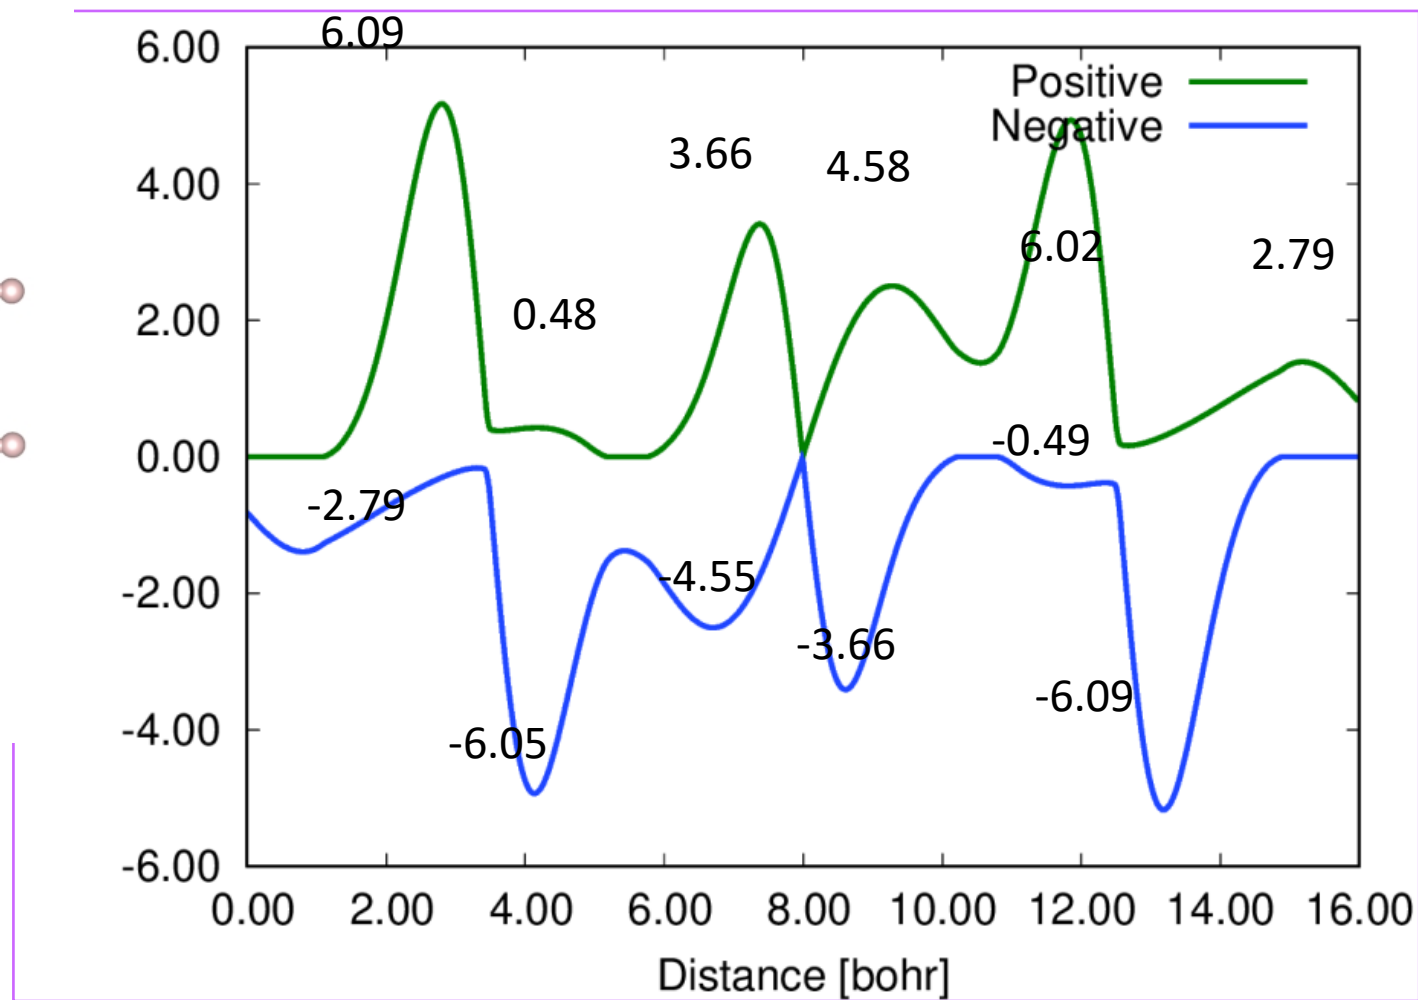

Supplement: d3cp02214e1.pdf [file d3cp02214e1.pdf]
