# Supplementary material for: The magnetically induced current density of the [12]infinitene dianion
Source: Royal Society of Chemistry journal article supplement (doi:10.1039/d3cp02214e), 2023-01-01
Supplement: d3cp02214e2.pdf [file d3cp02214e2.pdf]

# Journal Name

## ARTICLE TYPE

Cite this: DOI:00.0000/xxxxxxxxxx

Electronic Supplementary Information

### The magnetically induced current density of the [12]infinetene dianion<sup>†</sup>

Qian Wang,<sup>a</sup> Mesías Orozco-Ic,<sup>a,b</sup> and Dage Sundholm<sup>\*a</sup>

Received Date

Accepted Date

DOI:00.0000/xxxxxxxxxx

<sup>a</sup> Department of Chemistry, Faculty of Science, University of Helsinki, P.O. Box 55, A. I. Virtasen aukio 1, FIN-00014 Helsinki, Finland; E-mails: qian.x.wang@helsinki.fi, mesias.orozco@dipc.org, dage.sundholm@helsinki.fi

<sup>b</sup> Donostia International Physics Center (DIPC), 20018 Donostia, Euskadi, Spain

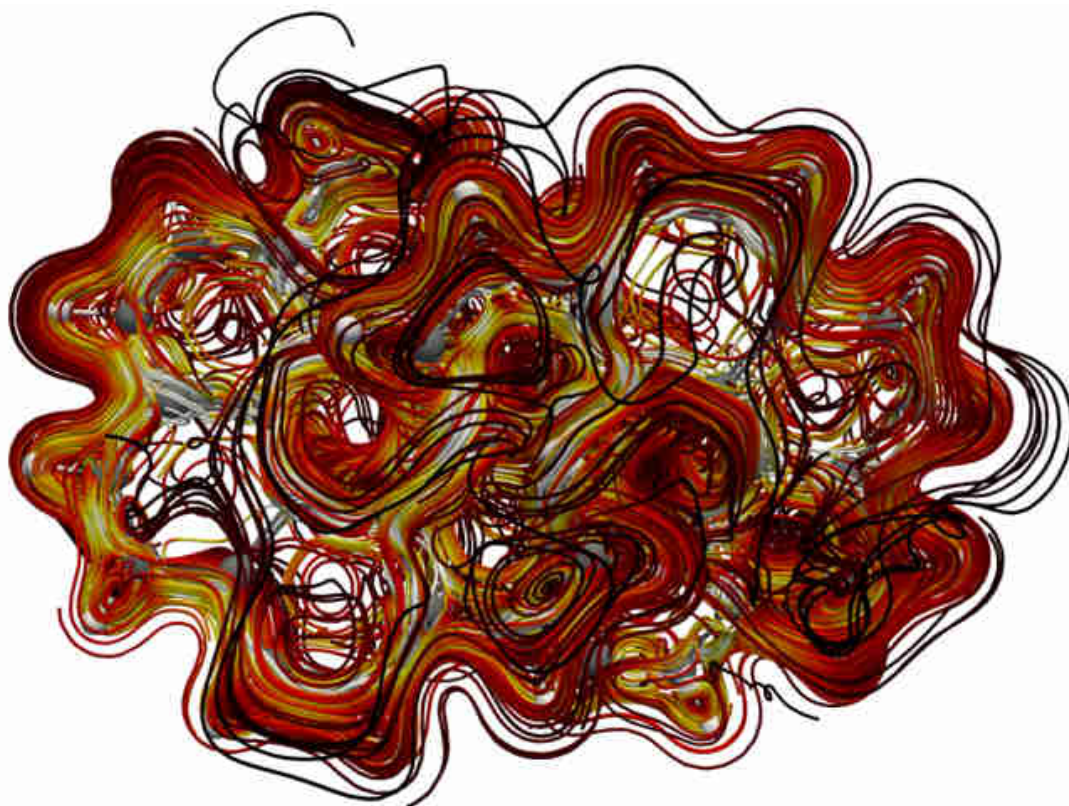

**Figure S1** The current density of [12]annulene dianion. The color scheme corresponds to the strength of the current density with white being the strongest and then yellow and then red, the weakest ones are black. The pictures have been made with Paraview.

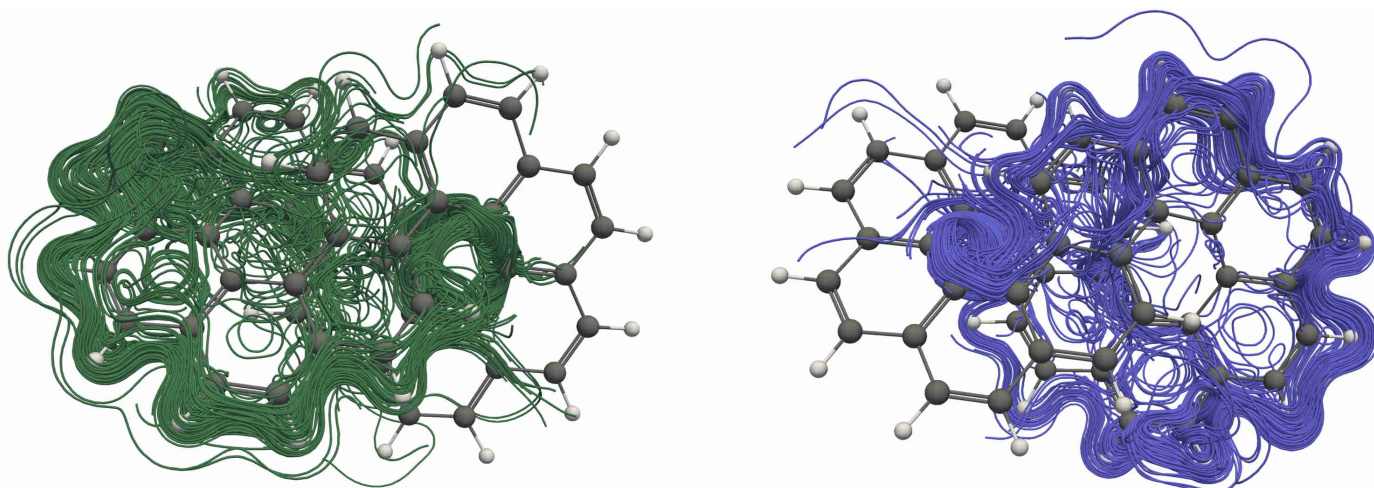

**Figure S2** Two independent global ring currents are shown in green and blue, respectively. The current-density pictures have been made with paraview.

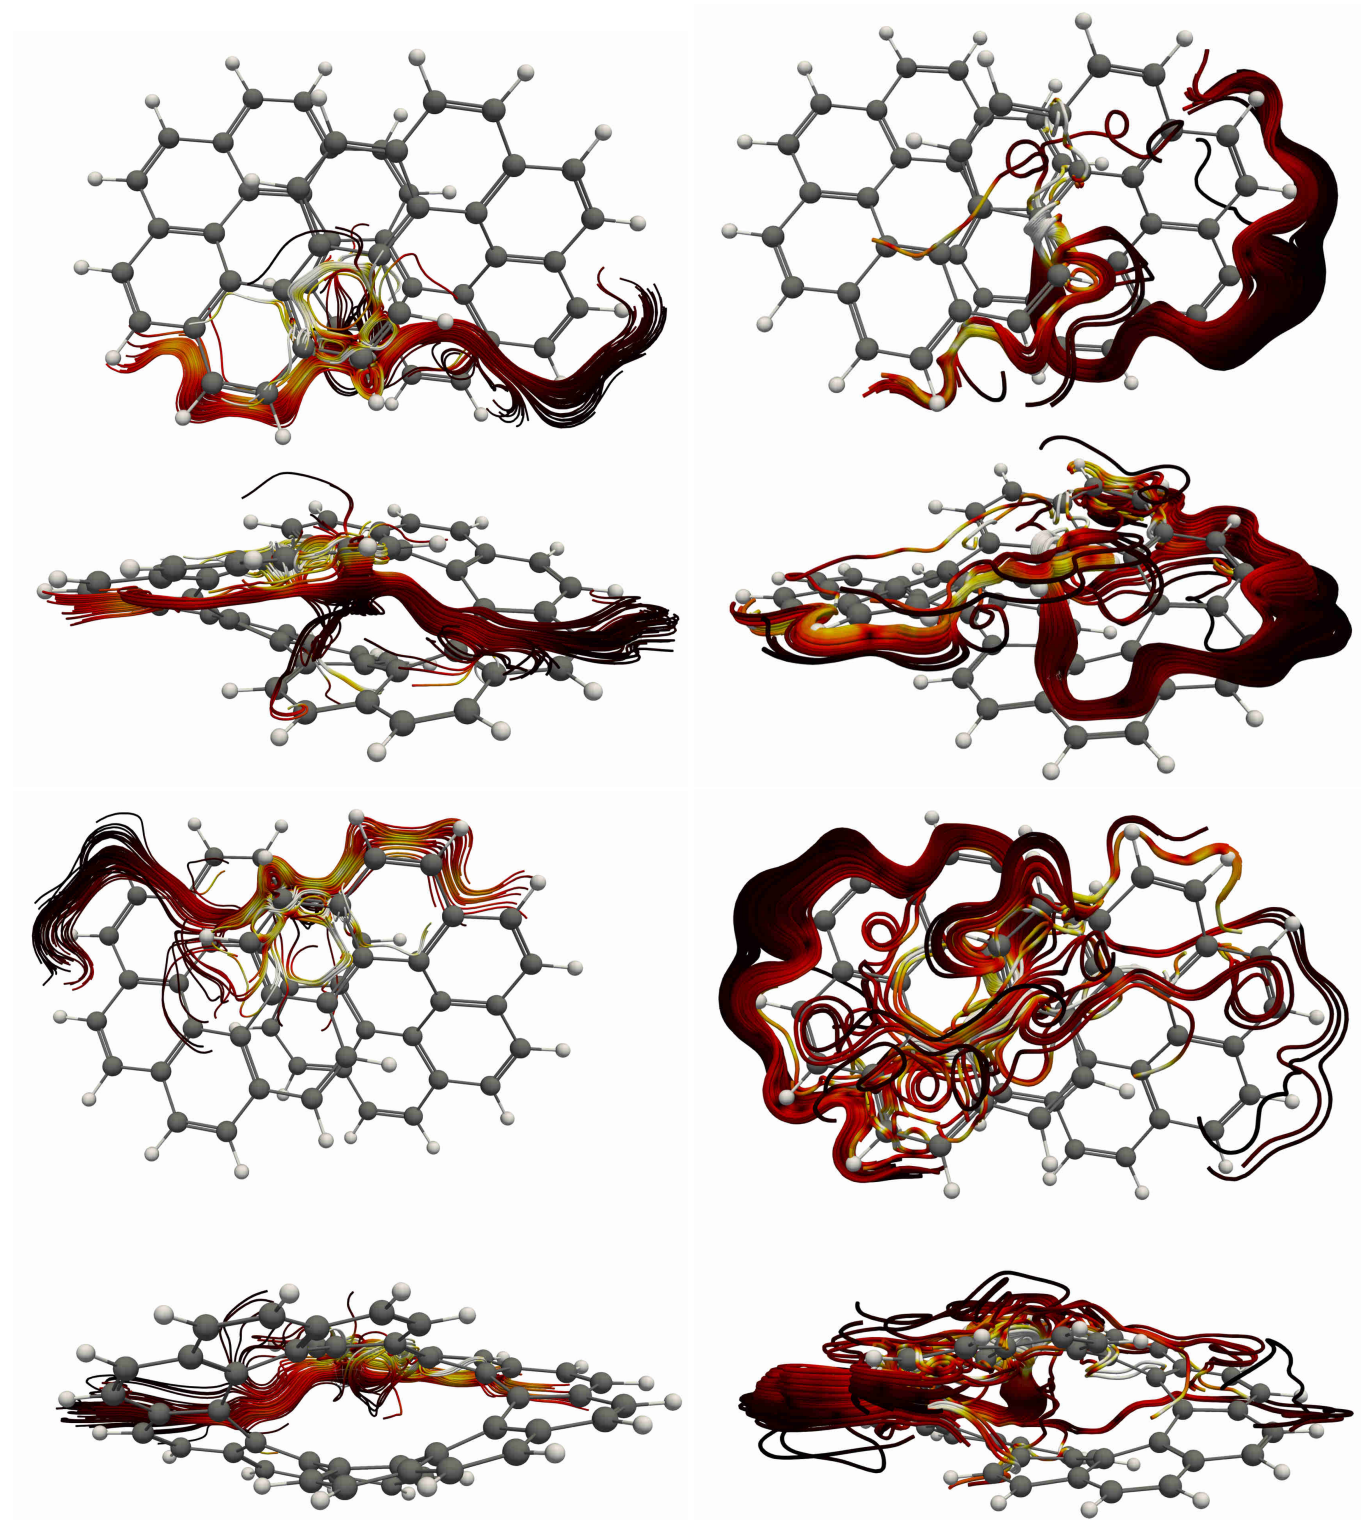

**Figure S3** The current density through the space from one side of the molecule to the other. The color scheme corresponds to the strength of the current density with white being the strongest and then yellow and then red, the weakest ones are black. The current-density pictures have been made with paraview.

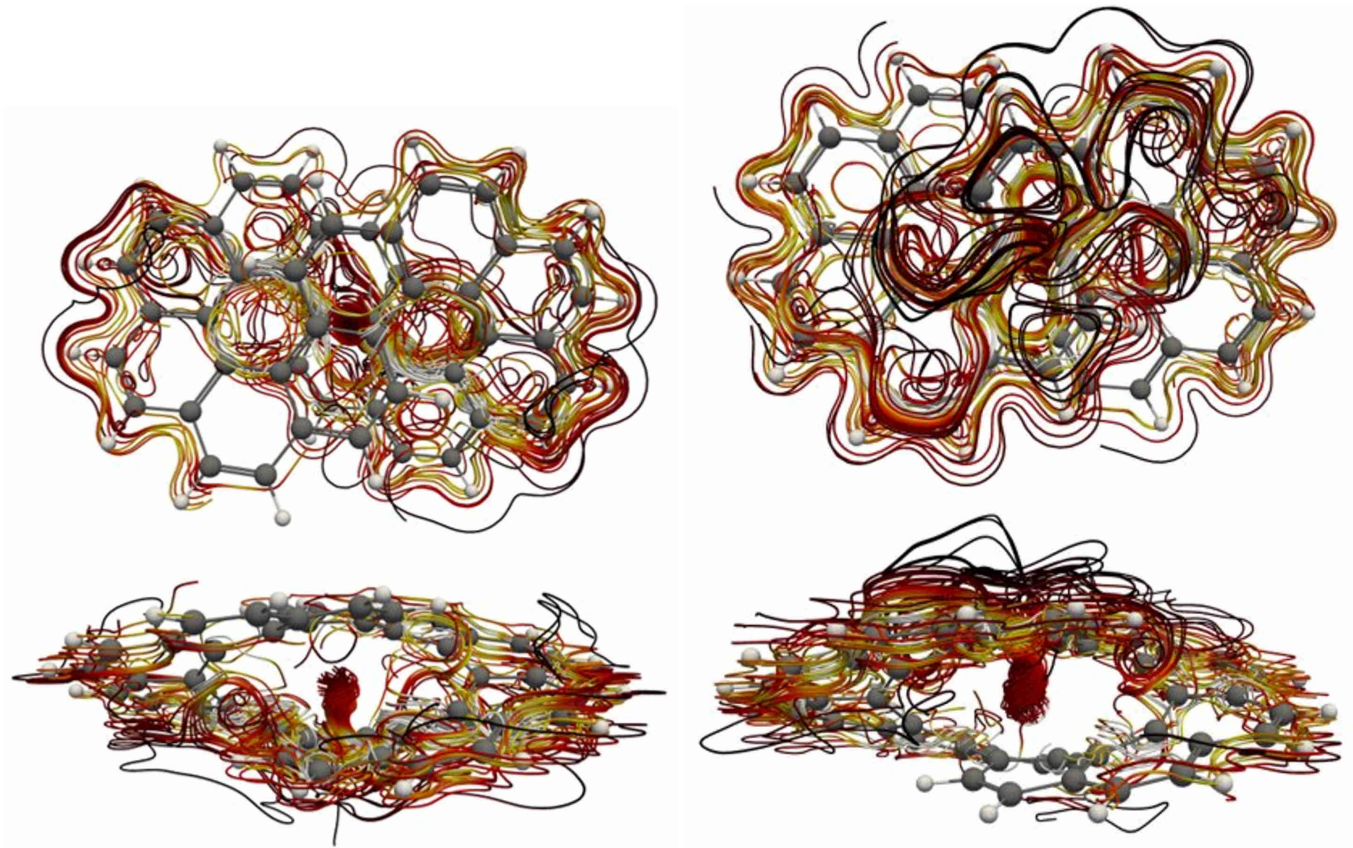

**Figure S4** Through-space current-density pathways. The color scheme corresponds to the strength of the current density with white being the strongest and then yellow and then red, the weakest ones are black. The current-density pictures have been made with paraview.

Cartesian coordinates (in Å) of the optimized molecular structure of the [12]infinite dianion

|   |            |            |            |
|---|------------|------------|------------|
| C | -1.2395717 | -1.3322532 | -1.7254663 |
| C | -0.4129834 | -2.4350223 | -1.8916262 |
| C | 0.9495472  | -2.3475613 | -1.6173251 |
| C | 1.7470821  | -3.5242295 | -1.6477682 |
| C | 3.0550517  | -3.4721249 | -1.3370063 |
| C | 3.6609789  | -2.2619821 | -0.8879886 |
| C | 5.0481637  | -2.2588918 | -0.6974232 |
| C | 5.6990163  | -1.1094940 | -0.3501065 |
| C | 4.9582058  | 0.0263987  | 0.0137249  |
| C | 5.6843758  | 1.1796269  | 0.4058729  |
| C | 5.0397639  | 2.2890878  | 0.8188774  |
| C | 3.6333894  | 2.2717276  | 1.0083783  |
| C | 2.8841475  | 1.0887989  | 0.7611581  |
| C | 3.5271613  | 0.0230814  | 0.0315929  |
| C | 2.8674652  | -1.0829585 | -0.7054509 |
| C | 1.5490186  | -1.1014397 | -1.2431133 |
| C | 0.7164399  | 0.0807380  | -1.4596414 |
| C | 1.2395717  | 1.3322532  | -1.7254663 |
| C | -0.7164399 | -0.0807380 | -1.4596414 |
| C | 0.4129834  | 2.4350223  | -1.8916262 |
| C | -1.5490186 | 1.1014397  | -1.2431133 |
| C | -0.9495472 | 2.3475613  | -1.6173251 |
| C | -2.8674652 | 1.0829585  | -0.7054509 |
| C | -1.7470821 | 3.5242295  | -1.6477682 |
| C | -3.6609789 | 2.2619821  | -0.8879886 |
| C | -3.5271613 | -0.0230814 | 0.0315929  |
| C | -3.0550517 | 3.4721249  | -1.3370063 |
| C | -5.0481637 | 2.2588918  | -0.6974232 |
| C | -4.9582058 | -0.0263987 | 0.0137249  |
| C | -2.8841475 | -1.0887989 | 0.7611581  |
| C | -5.6990163 | 1.1094940  | -0.3501065 |
| C | -5.6843758 | -1.1796269 | 0.4058729  |
| C | -3.6333894 | -2.2717276 | 1.0083783  |
| C | -1.4955177 | -1.1159206 | 1.2127460  |
| C | -5.0397639 | -2.2890878 | 0.8188774  |
| C | -3.0093782 | -3.4737765 | 1.4170972  |
| C | -0.8842092 | -2.3740475 | 1.4915577  |
| C | -1.6596043 | -3.5393660 | 1.5789862  |
| C | -0.7073152 | 0.0472485  | 1.4303657  |
| C | 0.7073152  | -0.0472485 | 1.4303657  |
| C | 3.0093782  | 3.4737765  | 1.4170972  |
| C | 1.2834080  | -1.3321509 | 1.6396071  |
| C | 0.5043606  | -2.4359837 | 1.7378887  |
| C | 1.4955177  | 1.1159206  | 1.2127460  |
| C | -0.5043606 | 2.4359837  | 1.7378887  |
| C | -1.2834080 | 1.3321509  | 1.6396071  |
| C | 1.6596043  | 3.5393660  | 1.5789862  |
| C | 0.8842092  | 2.3740475  | 1.4915577  |
| H | -0.8318396 | -3.4044851 | -2.1316553 |
| H | 1.2803754  | -4.4577393 | -1.9414524 |
| H | 3.6805167  | -4.3545247 | -1.4123315 |
| H | 5.5975335  | -3.1724578 | -0.8929414 |
| H | 6.7799862  | -1.0638162 | -0.3060477 |
| H | 6.7656205  | 1.1516944  | 0.3414843  |

|   |            |            |            |
|---|------------|------------|------------|
| H | 5.5818112  | 3.1969745  | 1.0553773  |
| H | 0.8318396  | 3.4044851  | -2.1316553 |
| H | -1.2803754 | 4.4577393  | -1.9414524 |
| H | -3.6805167 | 4.3545247  | -1.4123315 |
| H | -5.5975335 | 3.1724578  | -0.8929414 |
| H | -6.7799862 | 1.0638162  | -0.3060477 |
| H | -6.7656205 | -1.1516944 | 0.3414843  |
| H | -5.5818112 | -3.1969745 | 1.0553773  |
| H | -3.6300294 | -4.3522503 | 1.5460751  |
| H | -1.1698175 | -4.4771577 | 1.8136873  |
| H | 2.3104936  | 1.4574735  | -1.7946905 |
| H | -2.3104936 | -1.4574735 | -1.7946905 |
| H | 2.3516338  | -1.4081383 | 1.7737066  |
| H | 0.9433626  | -3.4003219 | 1.9638511  |
| H | -2.3516338 | 1.4081383  | 1.7737066  |
| H | 3.6300294  | 4.3522503  | 1.5460751  |
| H | 1.1698175  | 4.4771577  | 1.8136873  |
| H | -0.9433626 | 3.4003219  | 1.9638511  |

The  $^1\text{H}$  NMR shielding constants of [12]infinite dianion

| No. | Type | Mult. | Isotropic   |
|-----|------|-------|-------------|
| 49  | h    | 2     | 27.39803128 |
| 50  | h    | 2     | 25.90574235 |
| 51  | h    | 2     | 24.84621133 |
| 52  | h    | 2     | 24.67419763 |
| 53  | h    | 2     | 24.55579936 |
| 54  | h    | 2     | 23.65424114 |
| 55  | h    | 2     | 23.84713488 |
| 56  | h    | 0     | 27.39803128 |
| 57  | h    | 0     | 25.90574235 |
| 58  | h    | 0     | 24.84621133 |
| 59  | h    | 0     | 24.67419763 |
| 60  | h    | 0     | 24.55579936 |
| 61  | h    | 0     | 23.65424114 |
| 62  | h    | 0     | 23.84713488 |
| 63  | h    | 2     | 24.26090419 |
| 64  | h    | 2     | 24.14512372 |
| 65  | h    | 2     | 33.75926338 |
| 66  | h    | 0     | 33.75926338 |
| 67  | h    | 2     | 30.75342136 |
| 68  | h    | 2     | 24.90513054 |
| 69  | h    | 0     | 30.75342136 |
| 70  | h    | 0     | 24.26090419 |
| 71  | h    | 0     | 24.14512372 |
| 72  | h    | 0     | 24.90513054 |

The  $^{13}\text{C}$  NMR shielding constants of [12]infinite dianion

|   |   |   |             |
|---|---|---|-------------|
| 1 | c | 2 | 55.15964391 |
| 2 | c | 2 | 71.86258635 |
| 3 | c | 2 | 31.11896143 |
| 4 | c | 2 | 54.19760558 |
| 5 | c | 2 | 54.26224097 |
| 6 | c | 2 | 35.46318305 |
| 7 | c | 2 | 67.33901553 |
| 8 | c | 2 | 74.13565009 |
| 9 | c | 2 | 34.98442954 |

|    |   |   |             |
|----|---|---|-------------|
| 10 | c | 2 | 52.64918584 |
| 11 | c | 2 | 58.26958449 |
| 12 | c | 2 | 36.91836590 |
| 13 | c | 2 | 52.84282709 |
| 14 | c | 2 | 72.13481456 |
| 15 | c | 2 | 45.24510831 |
| 16 | c | 2 | 67.30673418 |
| 17 | c | 2 | 58.59759910 |
| 18 | c | 0 | 55.15964391 |
| 19 | c | 0 | 58.59759910 |
| 20 | c | 0 | 71.86258635 |
| 21 | c | 0 | 67.30673418 |
| 22 | c | 0 | 31.11896143 |
| 23 | c | 0 | 45.24510831 |
| 24 | c | 0 | 54.19760558 |
| 25 | c | 0 | 35.46318305 |
| 26 | c | 0 | 72.13481456 |
| 27 | c | 0 | 54.26224097 |
| 28 | c | 0 | 67.33901553 |
| 29 | c | 0 | 34.98442954 |
| 30 | c | 0 | 52.84282709 |
| 31 | c | 0 | 74.13565009 |
| 32 | c | 0 | 52.64918584 |
| 33 | c | 0 | 36.91836590 |
| 34 | c | 2 | 71.67819259 |
| 35 | c | 0 | 58.26958449 |
| 36 | c | 2 | 66.44645264 |
| 37 | c | 2 | 51.53876124 |
| 38 | c | 2 | 56.33880687 |
| 39 | c | 2 | 46.20077831 |
| 40 | c | 0 | 46.20077831 |
| 41 | c | 0 | 66.44645264 |
| 42 | c | 2 | 51.16001659 |
| 43 | c | 2 | 52.72499869 |
| 44 | c | 0 | 71.67819259 |
| 45 | c | 0 | 52.72499869 |
| 46 | c | 0 | 51.16001659 |
| 47 | c | 0 | 56.33880687 |
| 48 | c | 0 | 51.53876124 |

## NMR chemical shifts

### <sup>1</sup>H NMR (in ppm) of the [12]infinite dianion

<sup>1</sup>H NMR (in ppm) for atoms close to the holes in [12]infinite dianion

The TMS reference shielding constant 31.89235531 ppm

| Shielding constant | Chemical shift |
|--------------------|----------------|
| 33.75926338        | -1.86690807    |
| 30.75342136        | 1.13893395     |

<sup>1</sup>H NMR (in ppm) for atoms far away from the holes in [12]infinite dianion

The TMS reference shielding constant 31.89235531 ppm

| Shielding constant | Chemical shift |
|--------------------|----------------|
| 27.39803128        | 4.49432403     |
| 25.90574235        | 5.98661296     |
| 24.84621133        | 7.04614398     |
| 24.67419763        | 7.21815768     |
| 24.55579936        | 7.33655595     |

|             |            |
|-------------|------------|
| 23.65424114 | 8.23811417 |
| 23.84713488 | 8.04522043 |
| 24.26090419 | 7.63145112 |
| 24.14512372 | 7.74723159 |
| 24.90513054 | 6.98722477 |

**<sup>13</sup>C NMR (in ppm) of the [12]infinite dianion**

The TMS reference shielding constant 188.54716189 ppm

| Shielding constant | Chemical shift |
|--------------------|----------------|
| 55.15964391        | 133.38751798   |
| 71.86258635        | 116.68457554   |
| 31.11896143        | 157.42820046   |
| 54.19760558        | 134.34955631   |
| 54.26224097        | 134.28492092   |
| 35.46318305        | 153.08397884   |
| 67.33901553        | 121.20814636   |
| 74.13565009        | 114.41151180   |
| 34.98442954        | 153.56273235   |
| 52.64918584        | 135.89797605   |
| 58.26958449        | 130.27757740   |
| 36.91836590        | 151.62879599   |
| 52.84282709        | 135.70433480   |
| 72.13481456        | 116.41234733   |
| 45.24510831        | 143.30205358   |
| 67.30673418        | 121.24042771   |
| 58.59759910        | 129.94956279   |
| 71.67819259        | 116.86896930   |
| 66.44645264        | 122.10070925   |
| 51.53876124        | 137.00840065   |
| 56.33880687        | 132.20835502   |
| 46.20077831        | 142.34638358   |
| 51.16001659        | 137.38714530   |
| 52.72499869        | 135.82216320   |
